# Supplementary material for: Zfrp8, theDrosophilaortholog ofPDCD2,functions in lymph gland development and controls cell proliferation
Source: Oxford University Press journal article supplement (doi:10.1242/dev.003616), 2007-05-24
Supplement: dev003616tables1.pdf [file dev003616tables1.pdf]

Table S1. Zfrp8 genetic interactions

| Pathway                                      | Control genotype                                   | Tested genotype                                                | Monitored phenotype                      | Result                    | Lymph gland size            |
|----------------------------------------------|----------------------------------------------------|----------------------------------------------------------------|------------------------------------------|---------------------------|-----------------------------|
| Ras                                          | UAS-Ras1 <sup>v12</sup> /+; hsp70-GAL4/+           | Df(2R)SM206/UAS-Ras1 <sup>v12</sup> ; hsp70-GAL4/+             | Lethality, melanotic phenotype           | -                         | -                           |
|                                              | UAS-Ras1 <sup>v12</sup> /+; hsp70-GAL4/+           | Zfrp8 <sup>M-1-1</sup> /UAS-Ras1 <sup>v12</sup> ; hsp70-GAL4/+ | Lethality, melanotic phenotype           | -                         | -                           |
|                                              | UAS-Ras1 <sup>v12</sup> /+; arm-GAL4/+             | Df(2R)SM1183/UAS-Ras1 <sup>v12</sup> ; arm-GAL4/+              | Lethality                                | -                         | -                           |
|                                              | Df(2R)SM206/+                                      | Df(2R)SM206/UAS-Ras1.v12; hsp70-GAL4/+                         | Lymph gland size increase                | -                         | 2.1 (0.2)                   |
| Toll                                         | Toll <sup>10B</sup>                                | Df(2R)SM206/+; Toll <sup>10B</sup>                             | Melanotic masses, lymph gland overgrowth | -                         | Same as Toll <sup>10B</sup> |
|                                              | Toll <sup>10B</sup>                                | Zfrp <sup>M-1-1</sup> /+; Toll <sup>10B</sup>                  | Melanotic masses, lymph gland overgrowth | -                         | Same as Toll <sup>10B</sup> |
|                                              | Toll <sup>β</sup>                                  | Df(2R)SM206/+; Toll <sup>β</sup>                               | Melanotic masses, lymph gland overgrowth | -                         | Same as Toll <sup>β</sup>   |
|                                              | Df(2R)SM206/+                                      | Df(2R)SM206/cactus <sup>Δ2</sup>                               | Lymph gland size increase                | -                         | 2.5 (0.7)                   |
| JAK/STAT                                     | Df(2R)SM206/+                                      | Df(2R)SM206/cactus <sup>1</sup>                                | Lymph gland size increase                | -                         | -                           |
|                                              | Hop <sup>Tum</sup>                                 | Df(2R)SM206/+; Hop <sup>Tum</sup>                              | Melanotic masses                         | -                         | Same as Hop <sup>Tum</sup>  |
|                                              | Hop <sup>Tum</sup>                                 | Zfrp8 <sup>M-1-1</sup> /+; Hop <sup>Tum</sup>                  | Melanotic masses                         | -                         | Same as Hop <sup>Tum</sup>  |
|                                              | Hop <sup>Tum</sup>                                 | Df(2R)SM206/+; Hop <sup>Tum</sup>                              | Lymph gland phenotype                    | -                         | Same as Hop <sup>Tum</sup>  |
| GATA                                         | Df(2R)SM206/+                                      | Df(2R)SM206/+; srp <sup>3</sup> /+                             | Lymph gland size increase                | -                         | 2.0 (0.4)                   |
|                                              | Df(2R)SM206/+                                      | Df(2R)SM206/+; srp <sup>01549</sup> /+                         | Lymph gland size increase                | -                         | 2.2 (0.5)                   |
|                                              | Df(2R)SM206/+                                      | Df(2R)SM206/+; pnr <sup>MD237</sup> /+                         | Lymph gland size increase                | Su                        | 1.2 (0.3)                   |
|                                              | Df(2R)SM206/+                                      | Df(2R)SM206/+; pnr <sup>VX6</sup> /+                           | Lymph gland size increase                | Su                        | 0.9 (0.3)                   |
|                                              | Df(2R)SM206                                        | Df(2R)SM206; pnr <sup>MD237</sup> /+                           | Lymph gland over-growth                  | Su                        | 3.3 (1.6)                   |
| Notch                                        | Df(2R)SM206/+                                      | Df(2R)SM206/+; Ser <sup>1</sup> /+                             | Lymph gland size increase                | -                         | 2.1 (0.6)                   |
| Other genes causing blood-related phenotypes | Df(2R)SM206/+                                      | Df(2R)SM206/+; Su(var)205 <sup>04</sup> /+                     | Lymph gland size increase                | -                         | 2.0 (0.3)                   |
|                                              | Df(2R)SM206/+                                      | Df(2R)SM206/dom <sup>k08108</sup>                              | Lymph gland size increase                | -                         | 2.2 (0.4)                   |
|                                              | Df(2R)SM206/+                                      | Df(2R)SM206/ytr <sup>k13108</sup>                              | Lymph gland size increase                | -                         | 2.3 (0.6)                   |
|                                              | l(3)mbrn/+                                         | Df(2R)SM206/+; l(3)mbrn/+                                      | Melanotic masses                         | -                         | Same as l(3)mbrn/+          |
|                                              | Df(2R)SM206/+                                      | Df(2R)SM206/+; l(3)mbrn/+                                      | Lymph gland size increase                | -                         | Same as l(3)mbrn/+          |
|                                              | Df(2R)SM206/+                                      | skpA <sup>G0389</sup> /+; Df(2R)SM206/+                        | Lymph gland size increase                | -                         | 2.0 (0.7)                   |
|                                              | Df(2R)SM206/+                                      | PrSet7 <sup>20</sup> /+; Df(2R)SM206/+                         | Lymph gland size increase                | -                         | 1.8 (0.1)                   |
|                                              | Df(2R)SM206                                        | Bc <sup>1</sup> /Df(2R)SM206                                   | Lymph gland size increase                | -                         | 2.1 (0.7)                   |
|                                              | Bc <sup>1</sup> /+                                 | Bc <sup>1</sup> /Df(2R)SM206                                   | 'Black' crystal cells phenotype          | -                         | -                           |
|                                              | Cell cycle                                         | Df(2R)SM206/+                                                  | Df(2R)SM206/+; cdc27 <sup>L7123</sup> /+ | Lymph gland size increase | E                           |
| Df(2R)SM206/+                                |                                                    | Df(2R)SM206/cdc2 <sup>E1-23</sup>                              | Lymph gland size increase                | -                         | 2.3 (0.8)                   |
| Df(2R)SM206/+                                |                                                    | Df(2R)SM206/cycB <sup>KG08886</sup>                            | Lymph gland size increase                | -                         | 1.9 (0.5)                   |
| Df(2R)SM206/+                                |                                                    | Df(2R)SM206/+; polo <sup>01673</sup> /+                        | Lymph gland size increase                | -                         | 2.1 (0.5)                   |
| Df(2R)SM206/+                                |                                                    | Df(2R)SM206/+; aur <sup>1</sup> /+                             | Lymph gland size increase                | -                         | 2.2 (0.5)                   |
| Df(2R)SM206/+                                |                                                    | Df(2R)SM206/cnn <sup>HK2</sup>                                 | Lymph gland size increase                | -                         | 2.0 (0.5)                   |
| Df(2R)SM206/+                                |                                                    | l(1)dd4 <sup>4</sup> /+; Df(2R)SM206/+                         | Lymph gland size increase                | E                         | 4.7 (1.3)                   |
| Programmed cell death                        |                                                    | Df(2R)SM206/+                                                  | Df(2R)SM206/Ark <sup>k11502</sup>        | Lymph gland size increase | -                           |
|                                              | Df(2R)SM206/+                                      | Df(2R)SM206/Ark <sup>Df(2R)PB03-Delta15</sup>                  | Lymph gland size increase                | -                         | 2.4 (0.5)                   |
|                                              | Df(2R)SM206/+                                      | Df(2R)SM206/dcp-1 <sup>K05606</sup>                            | Lymph gland size increase                | -                         | 2.1 (0.5)                   |
|                                              | Df(2R)SM206/+                                      | Df(2R)SM206/+; th <sup>4</sup> /+                              | Lymph gland size increase                | -                         | 2.1 (0.7)                   |
|                                              | Df(2R)SM206/+                                      | Df(2R)SM206/+; dronc <sup>1</sup> /+                           | Lymph gland size increase                | -                         | 2.3 (0.7)                   |
|                                              | Df(2R)SM206/+                                      | Df(2R)SM206/+; dronc <sup>51</sup> /+                          | Lymph gland size increase                | -                         | 2.3 (0.4)                   |
|                                              | Df(2R)SM206/+                                      | Df(2R)SM206/+; dronc <sup>51</sup> / dronc <sup>2</sup>        | Lymph gland size increase                | -                         | Same as dronc               |
|                                              | Df(2R)SM206/+                                      | Df(2R)SM206/+; dronc <sup>51</sup> / dronc <sup>2</sup>        | Lethality, lymph gland increase          | -                         | Same as dronc               |
|                                              | Zfrp8 <sup>M-1-1</sup> /Df(2R)SM206                | Zfrp8 <sup>M-1-1</sup> /Df(2R)SM206; dronc <sup>1</sup> /+     | Lymph gland overgrowth                   | -                         | 2.2 (0.7)                   |
|                                              | GMR-grim/+                                         | Df(2R)SM206/GMR-grim                                           | Small eye                                | -                         | -                           |
|                                              | GMR-grim/+                                         | Zfrp8 <sup>M-1-1</sup> /GMR-grim                               | Small eye                                | -                         | -                           |
|                                              | GMR-hid/+                                          | Df(2R)SM206/GMR-hid                                            | Small eye                                | -                         | -                           |
|                                              | GMR-hid/+                                          | Zfrp8 <sup>M-1-1</sup> /GMR-hid                                | Small eye                                | -                         | -                           |
|                                              | GMR-rpr/+                                          | Df(2R)SM206/+; GMR-rpr/+                                       | Small eye                                | -                         | -                           |
|                                              | GMR-rpr/+                                          | Zfrp8 <sup>M-1-1</sup> /+; GMR-rpr/+                           | Small eye                                | -                         | -                           |
| GMR-rpr/+                                    | ey-FLP; FRT G13 Zfrp8 <sup>M-1-1</sup> ; GMR-rpr/+ | Small eye                                                      | -                                        | -                         |                             |
| hs-rpr/+                                     | Df(2R)SM206/+; hs-rpr/+                            | Temperature induced lethality                                  | -                                        | -                         |                             |

Lymph gland size the area of 2D lymph gland images were measured (in pixels) and normalized to the area of wild-type lymph gland. The average lymph gland size for wild-type was 1 (s.d. 0.3) and for Df(2R)SM206/+ was 2.2 (s.d. 0.5).

-, no change in phenotype.

Su, phenotype suppression.

E, phenotype enhanced.
